# Supplementary material for: Exposure to digital marketing enhances young adults’ interest in energy drinks: An exploratory investigation
Source: PLoS One. 2017 Feb 2;12(2):e0171226. doi: 10.1371/journal.pone.0171226 (PMC5289551; doi:10.1371/journal.pone.0171226)
Supplement: S1 File — Minimal dataset obtained from pre- and post-test surveys. (XLSX) [file pone.0171226.s006.xlsx]

## Sheet: Data sharing exposure experimen
Participant_Number	Group	Gender	Age	PreAtt_V_Avg	PreAtt_RB_Avg	PreAtt_Carmans_Avg	PreAtt_GoNat_Avg	PreAtt_Nut_Avg	PreAtt_ED_Avg	PrePurchase_V	PrePurchase_RB	PrePurchase_Carmans	PrePurchase_GoNat	PrePurchase_Nut	PrePurchase_ED	PostAtt_Carms_Avg	PostAtt_GoNat_Avg	PostAtt_Nut_Avg	PostAtt_RB_Avg	PostAtt_V_Avg	PostAtt_ED_Avg	PostPurchase_Carmans	PostPurchase_GoNat	PostPurchase_Nut	PostPurchase_RB	PostPurchase_V	PostPurchase_ED	PreIntendedcon_ED	PostIntendedcon_ED	PreIntendedcon_Nutbars	PostIntededcon_Nutbars	DiffAtt_RB	DiffAtt_V	DiffAtt_ED	DiffPurchase_RB	DiffPurchase_V	DiffPurchase_ED
17	1	2	18	-2.4	-2.4	1.2	-1.4	1.2	-2.2	-2	-2	1	-2	1	-2	9	9	9	-3	-3	-3	9	9	9	-1	-2	-2	0	0	0	0	-0.6	-0.6	-0.8	1	0	0
18	1	2	19	-2	-2.4	1.2	-1.2	2	-1.8	-1	-2	1	-2	1	-2	9	9	9	-0.8	-0.2	-0.4	9	9	9	-1	0	-1	0	0	1	1	1.6	1.8	1.4	1	1	1
19	0	2	21	-1.2	-1.2	2	2	2.6	-1	-2	-2	2	2	1	-2	2	1.8	2	-2.4	-1.8	-2.4	1	1	1	-2	-2	-2	0	0	0	0	-1.2	-0.6	-1.4	0	0	0
20	1	2	20	-1.8	-1	2.8	0.4	2	-1.8	-2	-2	1	0	1	-2	9	9	9	1.2	-1.2	0.8	9	9	9	0	-2	-1	0	0	0	0	2.2	0.6	2.6	2	0	1
21	0	2	23	-1.6	1.2	3	2.2	2.6	-1.2	-2	-2	2	1	2	-2	3	2.6	2	1.6	-1.6	-1.2	2	1	2	-2	-2	-2	0	0	1	1	0.4	0	0	0	0	0
22	0	2	19	-2.6	-3	2	1.4	1.6	-3	-2	-2	1	1	1	-2	2.4	-0.4	1.2	-3	-3	-3	1	-1	1	-2	-2	-2	1	0	0	1	0	-0.4	0	0	0	0
23	1	2	20	-3	-3	2.2	0.6	2	-3	-2	-2	2	0	1	-2	9	9	9	-2.8	-3	-3	9	9	9	-2	-2	-2	0	0	0	0	0.2	0	0	0	0	0
24	0	2	18	-1.4	-0.4	1.6	2	1.2	-0.6	-1	-1	0	1	-1	-1	3	2.4	1.8	-0.8	-1.6	-0.8	1	0	0	-1	-2	-1	0	0	0	1	-0.4	-0.2	-0.2	0	-1	0
25	1	2	20	-0.8	-1	1.2	2	-0.2	0.8	1	2	2	2	1	2	9	9	9	1.2	0.8	1	9	9	9	0	1	1	0	0	0	0	2.2	1.6	0.2	-2	0	-1
26	1	1	18	-1.2	0.2	-1.2	-0.8	1.4	-0.6	-2	0	1	0	2	-1	9	9	9	1.4	0.8	1	9	9	9	1	-1	0	0	1	0	0	1.2	2	1.6	1	1	1
27	1	1	18	-1.4	-1.6	0	1	2	-1.8	-2	-2	0	1	1	-2	9	9	9	0	-1	-0.4	9	9	9	-2	-2	-2	0	0	0	0	1.6	0.4	1.4	0	0	0
28	0	2	18	-2.6	-3	3	-1.2	1	-3	-2	-2	2	-1	0	-2	2.6	1.6	2.6	-3	-3	-3	2	2	2	-2	-2	-2	0	0	0	1	0	-0.4	0	0	0	0
29	0	1	23	1.8	2	0	0	2	1.4	1	1	-1	-1	1	-1	2.4	2	2.4	1.2	1	0.6	1	1	1	-1	-1	-1	0	0	0	0	-0.8	-0.8	-0.8	-2	-2	0
30	0	1	19	-2	-0.6	2.6	2	2.4	-1.6	-1	-1	2	2	2	-1	2.6	2.2	2.4	-1.4	-1.6	-1.8	2	2	2	-1	-2	-2	0	0	0	1	-0.8	0.4	-0.2	0	-1	-1
31	1	2	22	-0.8	0.2	-3	3	-0.6	0.4	-1	0	-2	2	-1	1	9	9	9	-1.2	1	-0.2	9	9	9	-1	1	0	0	1	1	0	-1.4	1.8	-0.6	-1	2	-1
32	1	1	18	-0.8	0.8	0	2.4	1.6	-0.2	-1	-1	0	2	1	-1	9	9	9	0.2	1.2	0	9	9	9	0	0	-1	0	0	1	1	-0.6	2	0.2	1	1	0
33	1	1	20	1	0.8	1.8	1.8	1.4	1.6	1	0	2	1	1	1	9	9	9	1.6	2	1.8	9	9	9	1	1	1	0	1	0	0	0.8	1	0.2	1	0	0
34	0	1	19	-0.6	-0.6	0.2	0.2	0.8	0.8	1	1	1	1	1	0	1.8	0.8	2	-0.2	0	-1.2	1	0	1	1	-1	0	0	0	1	1	0.4	0.6	-2	0	-2	0
35	1	1	22	-0.8	-0.8	3	-0.6	3	-1	-2	-2	2	-2	2	-2	9	9	9	-0.8	-1.4	-1.4	9	9	9	-2	-2	-2	0	0	0	0	0	-0.6	-0.4	0	0	0
36	1	2	23	0.6	-0.4	0	0	0.2	0	1	-2	0	0	1	-2	9	9	9	-0.2	2.6	1	9	9	9	-1	1	1	1	1	0	0	0.2	2	1	1	0	3
37	0	2	24	-1.2	-0.4	1	1	1.8	-0.6	-2	-2	1	1	1	-2	1.4	2.4	0.8	-1	-0.8	-0.8	1	1	0	-2	-2	-2	0	0	1	1	-0.6	0.4	-0.2	0	0	0
38	1	1	22	1.6	0.6	-0.2	0	-0.4	1.4	1	1	-2	-2	0	1	9	9	9	2.4	1.4	1.6	9	9	9	2	1	1	0	0	0	0	1.8	-0.2	0.2	1	0	0
39	1	2	18	-0.2	0.2	0	0.4	0.2	0.4	-2	-2	1	1	0	-1	9	9	9	0	0.2	0.2	9	9	9	-2	-2	-2	0	0	0	0	-0.2	0.4	-0.2	0	0	-1
40	0	2	18	-0.2	-0.6	-0.2	0	0	-0.4	-2	-2	-2	-2	-2	-2	2.4	1.8	2.2	-2.2	-2.4	-2	-1	-1	-1	-2	-2	-2	0	0	0	1	-1.6	-2.2	-1.6	0	0	0
41	0	2	19	-1.2	-0.4	2.2	0	1.4	-1	-1	-1	2	0	1	-1	2.4	-1	1	-0.6	-1.4	-1.2	2	-2	1	-1	-1	-1	1	0	0	0	-0.2	-0.2	-0.2	0	0	0
42	1	2	20	0	-1.6	0.4	0	1	-0.4	1	-2	-1	-2	-1	0	9	9	9	-1.8	2	0	9	9	9	-1	2	0	0	1	0	0	-0.2	2	0.4	1	1	0
43	1	2	18	3	1.4	0.8	2.2	1	2.2	1	-1	0	0	0	1	9	9	9	1	3	2.4	9	9	9	-1	2	1	1	1	0	0	-0.4	0	0.2	0	1	0
44	1	1	21	-0.2	1.4	1	1.4	0.8	0.6	0	0	1	0	1	-1	9	9	9	2.6	-1.2	1.6	9	9	9	2	1	1	0	1	1	0	1.2	-1	1	2	1	2
45	1	1	22	0.6	0	0	0	0	1	1	0	0	0	0	1	9	9	9	3	3	3	9	9	9	1	1	1	0	0	0	0	3	2.4	2	1	0	0
46	0	1	19	-0.2	2.4	-3	-3	-0.6	3	2	2	-1	-1	-1	0	0.2	-1	-0.4	3	-0.4	3	1	1	0	2	2	2	0	0	0	0	0.6	-0.2	0	0	0	2
47	0	2	19	-0.2	-0.6	0	0	0	-0.4	0	1	0	0	0	1	1.2	0.2	0.2	0	0.2	0.2	1	1	1	-1	-1	-1	0	0	0	0	0.6	0.4	0.6	-2	-1	-2
48	0	2	19	0	0	-0.8	0	-0.8	-0.2	-1	-1	1	0	1	-1	0	0	-0.4	0	0	0	1	1	1	-1	-1	-1	0	0	0	0	0	0	0.2	0	0	0
49	0	2	19	-3	0.2	2.4	0	2	1	-2	1	2	0	2	1	2.6	1.4	2.6	0	-2	0.6	2	2	2	1	-2	1	0	0	1	1	-0.2	1	-0.4	0	0	0
50	1	1	24	-1.8	-1.6	-0.4	-1.2	0	-1.8	-2	-2	-2	-1	0	-2	9	9	9	-1.8	-1.8	-1.8	9	9	9	-2	-2	-2	0	0	0	0	-0.2	0	0	0	0	0
51	1	1	23	1.8	2	1.6	1	1.8	2.2	-2	2	1	1	1	1	9	9	9	3	0.8	2.2	9	9	9	2	-2	1	0	1	0	0	1	-1	0	0	0	0
52	0	2	22	0	0.6	1	1	1.2	0.6	-1	2	0	0	1	1	1.6	1.4	1.4	0.2	-0.4	0.4	2	1	1	1	-1	1	0	0	0	0	-0.4	-0.4	-0.2	-1	0	0
53	0	1	21	-1.2	-0.8	1	0.2	-0.2	-1	-2	-2	2	0	1	-2	2.2	0.4	1	-0.4	-0.6	-0.8	2	0	1	-2	-2	-2	0	0	1	1	0.4	0.6	0.2	0	0	0
54	0	2	23	-2.6	-2.6	2	2	2.6	-2.6	-2	-2	1	2	1	-2	3	3	2.6	-2.6	-2.6	-2.6	1	1	1	-2	-2	-2	0	0	0	1	0	0	0	0	0	0
55	1	1	22	-2.8	-3	0.4	0.2	0.8	-3	-2	-2	1	1	1	-2	9	9	9	-1.8	-1.8	-2.2	9	9	9	-2	-2	-2	0	0	0	0	1.2	1	0.8	0	0	0
56	1	2	20	-0.6	-1.2	0	0	1	-1.6	-1	-1	1	1	1	-1	9	9	9	0.6	0.8	0	9	9	9	1	0	-1	0	0	0	0	1.8	1.4	1.6	2	1	0
57	1	2	18	-1.8	-2.2	1.2	-1.4	2	-2	-2	-2	1	-1	1	-1	9	9	9	0.8	-1.6	-1.4	9	9	9	0	-1	-1	0	0	0	0	3	0.2	0.6	2	1	0
58	0	2	20	0	0.4	2	2	2	0	1	-1	1	1	1	0	2	0	1	0.4	0.2	0	2	-1	0	-1	1	0	0	0	0	1	0	0.2	0	0	0	0
59	0	1	18	0	-3	2.2	1	2	-3	-2	-2	1	1	1	-2	3	2	3	-3	-3	-3	1	0	2	-2	-2	-2	0	0	0	1	0	-3	0	0	0	0
60	0	2	22	0	-1	0	0	2	-0.6	-2	-2	0	0	1	-2	0.2	1.6	2	-1.4	0	-1	1	2	2	-2	-2	-2	0	0	0	1	-0.4	0	-0.4	0	0	0
61	0	2	22	-3	-3	2	1.6	1.8	-3	-2	-2	1	1	1	-2	2	1.4	2	-3	-3	-3	2	1	1	-2	-2	-2	0	0	1	1	0	0	0	0	0	0
62	0	2	18	-0.4	-0.4	1.2	1.4	0	-0.8	-2	-2	1	1	1	-1	1.2	0.4	0	-1.4	-0.2	-0.6	1	1	1	-1	-1	-2	0	0	0	1	-1	0.2	0.2	1	1	-1
63	0	2	21	-3	-3	1.6	2.8	2.6	-3	-2	-2	1	1	1	-2	2.4	0.2	1.4	-3	-3	-3	2	-2	1	-2	-2	-2	0	0	0	1	0	0	0	0	0	0
64	1	1	19	1	1.4	1	-0.6	0.8	1	0	1	0	-2	-1	1	9	9	9	2	1.6	1.8	9	9	9	1	1	1	1	1	0	0	0.6	0.6	0.8	0	1	0
65	0	1	22	0.6	-0.6	-0.2	0	0.2	-0.2	1	1	1	1	0	-1	2	1.6	0	-0.2	0	0	1	1	0	0	-1	-1	0	0	0	1	0.4	-0.6	0.2	-1	-2	0
66	0	1	24	0	1.2	0	0	0	1.6	1	1	0	0	0	0	-0.4	0.2	0.2	1.2	0.6	1.2	0	0	0	1	1	1	0	0	0	0	0	0.6	-0.4	0	0	1
67	1	1	22	0	1	0	0	2.8	0.8	0	1	-1	-1	2	1	9	9	9	1.2	2.4	1.2	9	9	9	0	1	1	1	1	0	0	0.2	2.4	0.4	-1	1	0
68	1	2	21	-1.4	0	2	2	1.4	-1.2	-2	-2	2	2	1	-2	9	9	9	2	-0.8	0	9	9	9	1	-2	0	0	1	0	0	2	0.6	1.2	3	0	2
69	1	2	19	-2.2	-1.6	0.4	-1.2	0.2	-2	-2	-2	-1	-2	-2	-2	9	9	9	-1.8	0.6	0.4	9	9	9	-2	-1	-2	0	0	0	0	-0.2	2.8	2.4	0	1	0
70	1	1	20	1	-0.2	0	-0.6	0	0.2	0	-1	-1	0	-1	-1	9	9	9	0.2	0.4	0	9	9	9	0	0	-1	0	0	0	0	0.4	-0.6	-0.2	1	0	0
71	0	2	18	0	1.6	0	0	1.8	1.4	-1	2	0	1	1	1	3	2.8	3	1.2	0.6	1.6	2	1	1	0	-1	0	0	0	0	1	-0.4	0.6	0.2	-2	0	-1
72	1	1	22	-0.4	-0.4	0	-0.6	0.4	-0.4	-1	-1	1	-1	1	-1	9	9	9	-0.2	-0.2	-0.6	9	9	9	-1	-1	-1	0	0	0	0	0.2	0.2	-0.2	0	0	0
73	0	1	18	-3	-3	0	0	1	-3	-2	-2	-2	0	1	-2	0.8	1.8	0.6	-3	-3	-3	1	0	1	-2	-2	-2	0	0	0	0	0	0	0	0	0	0
74	0	1	22	2	2	0	0	-1	2.6	2	2	0	0	-1	2	0	-1	0	2	2	2	0	0	0	2	2	2	0	0	0	0	0	0	-0.6	0	0	0
75	0	1	20	1.6	1.8	1.2	2	1.4	2	1	2	1	2	1	1	2	2	2	2.4	2.2	2.2	1	1	1	1	1	1	0	0	0	0	0.6	0.6	0.2	-1	0	0
76	1	1	21	0	0.4	0	0.4	1	-0.8	0	0	0	2	1	0	9	9	9	0.8	-0.4	0.2	9	9	9	1	-1	-1	0	0	0	0	0.4	-0.4	1	1	-1	-1
